# Supplementary material for: Recapitulating thyroid cancer histotypes through engineering embryonic stem cells
Source: Springer Nature journal article supplement (doi:10.1038/s41467-023-36922-1), 2023-03-11
Supplement: MOESM3 [file 41467_2023_36922_MOESM3_ESM.pdf]

## **Description of Additional Supplementary Files**

**Supplementary Data 1:** Clinical information and mutational background of patients included in datasets reported in Fig 1h, 2f, 5e, 5f and 5g.

**Supplementary Data 2:** Next Generation Sequencing data of 93 thyroid cancer patients included in the study.
